# Supplementary material for: Threshold for neural tube defect risk by accumulated singleton loss-of-function variants
Source: PubMed Central journal article supplement (PMC6170406; doi:10.1038/s41422-018-0061-3), 2018-07-05
Supplement: 41422_2018_61_MOESM2_ESM.pdf [file 41422_2018_61_MOESM2_ESM.pdf]

**Table S1.** Demographic characteristics in three different NTD cohorts.

| Variable | China Cohort      | US Cohort         | ME Cohort    |
|----------|-------------------|-------------------|--------------|
| Case #   | 100               | 74                | 69           |
| Region   | Shanxi            | Texas             | Qatar        |
| Age      | 20.7 ± 4.7(weeks) | 7.5 ± 5.4 (years) | 7.23 (years) |
| Gender:  |                   |                   |              |
| Male     | 60 (60%)          | 36 (48.6%)        | 28 (40.6%)   |
| Female   | 37 (37%)          | 38 (51.4%)        | 41 (59.4%)   |
| Unknown  | 3 (3%)            | 0                 | 0            |
| AE       | 95 (95%)          | 0                 | 0            |
| CRS      | 66 (66%)          | 0                 | 0            |
| OEC      | 33 (33%)          | 0                 | 0            |
| MM       | 1 (1%)            | 100%              | 100%         |

**AE**, anencephaly; **CRS**, craniorachischisis; **OEC**, occipital encephalocele; **MM**, myelomeningocele.

**Table S2.** The numbers of carriers with damaging variants were compared between Han Chinese NTDs and controls. Only damaging variants in the human orthologs of 249 previously reported NTD-associated genes in mouse were counted here (gene list was extracted from <https://ntdwiki.wikispaces.com>).

| Type      | carriers (no./total no.) |         | <i>P</i> Value <sup>a</sup> |
|-----------|--------------------------|---------|-----------------------------|
|           | NTD patients             | 1 KGP   |                             |
| LoF       | 7/100                    | 13/208  | 1                           |
| D-mis     | 56/100                   | 141/208 | 0.39                        |
| LoF+D-mis | 60/100                   | 146/208 | 0.48                        |

<sup>a</sup>*P* values were estimated using  $\chi^2$  test.

**Table S3** Number of carriers of SLoFVs among NTDs and controls.

| Race         | Number of SLoFVs      |                                    | <i>P</i> <sup>a</sup>   |
|--------------|-----------------------|------------------------------------|-------------------------|
| China Cohort | Cases, <i>n</i> = 100 | Controls (CHB&CHS), <i>n</i> = 208 | $7.84 \times 10^{-114}$ |
|              | 1500                  | 1318                               |                         |
| US Cohort    | Cases, <i>n</i> = 74  | Controls (CEU), <i>n</i> = 99      | $2.03 \times 10^{-39}$  |
|              | 834                   | 547                                |                         |
| ME Cohort    | Cases, <i>n</i> = 69  | Controls (1KGP), <i>n</i> = 2504   | $1.45 \times 10^{-9}$   |
|              | 516                   | 14107                              |                         |
| All NTDs     | Cases, <i>n</i> = 243 | Controls (1KGP), <i>n</i> = 2504   | $5.97 \times 10^{-237}$ |
|              | 2850                  | 14107                              |                         |

<sup>a</sup>*P* values were estimated using binomial test.

**Table S4** SLoFV enrichment analysis in the pathways with most SLoFVs.

| Pathway name                                     | CDS length <sup>a</sup> | #NTD/Ctrl <sup>b</sup> | <i>P</i> <sub>value</sub> <sup>c</sup> | <i>P</i> <sub>fdr</sub> <sup>d</sup> | <i>P</i> <sub>bonf</sub> <sup>e</sup> |
|--------------------------------------------------|-------------------------|------------------------|----------------------------------------|--------------------------------------|---------------------------------------|
| Metabolic pathways                               | 2048017                 | 84/109                 | 0.092                                  | 0.29                                 | 1                                     |
| Olfactory transduction                           | 523344                  | 35/28                  | 0.0046                                 | 0.059                                | 1                                     |
| Pathways in cancer                               | 815210                  | 25/19                  | 0.011                                  | 0.089                                | 1                                     |
| PI3K-Akt signaling pathway                       | 787584                  | 24/23                  | 0.064                                  | 0.212                                | 1                                     |
| Neuroactive ligand-receptor interaction          | 440236                  | 22/21                  | 0.075                                  | 0.246                                | 1                                     |
| Tight junction                                   | 385998                  | 22/14                  | 0.0052                                 | 0.059                                | 1                                     |
| Focal adhesion                                   | 649757                  | 21/22                  | 0.139                                  | 0.323                                | 1                                     |
| Vascular smooth muscle contraction               | 270444                  | 20/9                   | 0.0009                                 | 0.042                                | 0.252                                 |
| Huntington's disease                             | 421947                  | 20/23                  | 0.238                                  | 0.496                                | 1                                     |
| cGMP-PKG signaling pathway                       | 366986                  | 19/9                   | 0.0016                                 | 0.053                                | 0.469                                 |
| Oxytocin signaling pathway                       | 356229                  | 19/8                   | 0.0008                                 | 0.042                                | 0.232                                 |
| cAMP signaling pathway                           | 456229                  | 18/7                   | 0.0007                                 | 0.042                                | 0.209                                 |
| Inflammatory mediator regulation of TRP channels | 212076                  | 18/6                   | 0.00031                                | 0.03                                 | 0.091                                 |
| Bile secretion                                   | 158019                  | 18/10                  | 0.0054                                 | 0.059                                | 1                                     |

<sup>a</sup> Length of coding sequences in corresponding pathway.

<sup>b</sup> Number of SLoFV in NTD cohorts (174 Chinese Han and US CEU) and control (307 Chinese Han and CEU genomes from the 1KGP).

<sup>c</sup> *P* values were estimated using  $\chi^2$  test.

<sup>d</sup> *P* values were adjusted with FDR method.

<sup>e</sup> *P* values were adjusted with Bonferroni correction.
